# Supplementary material for: NIPTRIC: an online tool for clinical interpretation of non-invasive prenatal testing (NIPT) results
Source: PubMed Central journal article supplement (PMC5137038; doi:10.1038/srep38359), 2016-12-05
Supplement: srep38359-s1.pdf [file srep38359-s1.pdf]

## **NIPTRIC: an online tool for clinical interpretation of non-invasive prenatal testing (NIPT) results**

Birgit SIKKEMA-RADDATZ<sup>1,\*</sup>, Lennart F. JOHANSSON<sup>1,2</sup>, Eddy N. de BOER<sup>1</sup>, Elles M.J. BOON<sup>3</sup>, Ron F. SUIJKERBUIJK<sup>1</sup>, Katelijne BOUMAN<sup>1</sup>, Catia M. BILARDO<sup>4</sup>, Morris A. SWERTZ<sup>2</sup>, Martijn DIJKSTRA<sup>2</sup>, Irene M. van LANGEN<sup>1</sup>, Richard J. SINKE<sup>1</sup>, Gerard J. te MEERMAN<sup>1</sup>

**Supplementary tables**

**Supplementary Table 1.** Estimation of the personalized *a posteriori* risk (PPR) for a specific *a priori* risk, given an observed Z-score and unknown percentage of fetal DNA

| <b><i>A priori</i> risk</b> | Observed Z-score (%) |      |       |       |       |       |       |        |        |
|-----------------------------|----------------------|------|-------|-------|-------|-------|-------|--------|--------|
|                             | 2                    | 2.5  | 3     | 3.5   | 4     | 4.5   | 5     | 5.5    | 6.0    |
| 0.0001                      | 0                    | 0.01 | 0.04  | 0.21  | 1.40  | 10.88 | 58.39 | 96.66  | 99.86  |
| 0.0002                      | 0.01                 | 0.02 | 0.08  | 0.42  | 2.71  | 18.41 | 72.79 | 99.30  | 99.93  |
| 0.0005                      | 0.01                 | 0.05 | 0.20  | 1.03  | 6.23  | 32.39 | 86.53 | 99.31  | 99.97  |
| 0.001                       | 0.03                 | 0.10 | 0.40  | 2.01  | 10.98 | 45.11 | 92.68 | 99.66  | 99.99  |
| 0.0015                      | 0.04                 | 0.15 | 0.60  | 2.94  | 14.75 | 53.01 | 94.97 | 99.77  | 99.99  |
| 0.002                       | 0.06                 | 0.19 | 0.79  | 3.83  | 17.84 | 58.69 | 96.17 | 99.83  | 99.99  |
| 0.0025                      | 0.07                 | 0.24 | 0.98  | 4.68  | 20.44 | 63.04 | 96.91 | 99.86  | 99.99  |
| 0.005                       | 0.14                 | 0.48 | 1.93  | 8.44  | 29.20 | 75.57 | 98.43 | 99.93  | 100.00 |
| 0.01                        | 0.28                 | 0.96 | 3.69  | 14.09 | 38.47 | 85.38 | 99.21 | 99.97  | 100.00 |
| 0.025                       | 0.71                 | 2.34 | 8.22  | 23.71 | 51.86 | 93.42 | 99.70 | 99.99  | 100.00 |
| 0.05                        | 1.44                 | 4.52 | 13.89 | 31.08 | 63.51 | 96.63 | 99.85 | 99.99  | 100.00 |
| 0.1                         | 2.92                 | 8.48 | 21.24 | 37.78 | 75.66 | 98.36 | 99.93 | 100.00 | 100.00 |

**Supplementary table 2.** Estimation of the personalized *a posteriori* risk (PPR) based on an observed Z-score and the percentage of fetal DNA, at a coefficient of variation of 0.5 and an *a priori* risk of 1:1000

| Observed<br>Z-score | Percentage of fetal DNA (%) |        |        |        |        |        |        |        |        |
|---------------------|-----------------------------|--------|--------|--------|--------|--------|--------|--------|--------|
|                     | 3                           | 4      | 5      | 6      | 7      | 8      | 9      | 10     |        |
| 0                   | 0                           | 0      | 0      | 0      | 0      | 0      | 0      | 0      | 0      |
| 0.5                 | 0.01                        | 0      | 0      | 0      | 0      | 0      | 0      | 0      | 0      |
| 1.0                 | 0.02                        | 0      | 0      | 0      | 0      | 0      | 0      | 0      | 0      |
| 1.5                 | 0.10                        | 0.01   | 0      | 0      | 0      | 0      | 0      | 0      | 0      |
| 2.0                 | 0.45                        | 0.10   | 0.01   | 0.     | 0      | 0      | 0      | 0      | 0      |
| 2.5                 | 1.97                        | 0.73   | 0.01   | 0.01   | 0      | 0      | 0      | 0      | 0      |
| 3.0                 | 8.27                        | 5.18   | 1.21   | 0.10   | 0      | 0.     | 0      | 0.     | 0.     |
| 3.5                 | 28.77                       | 28.77  | 12.94  | 1.97   | 0.10   | 0      | 0      | 0      | 0      |
| 4.0                 | 64.41                       | 74.90  | 64.41  | 28.77  | 3.21   | 0.10   | 0      | 0      | 0      |
| 4.5                 | 89.02                       | 95.66  | 95.66  | 89.02  | 52.33  | 5.18   | 0.10   | 0      | 0      |
| 5.0                 | 97.32                       | 99.39  | 99.63  | 99.39  | 97.32  | 74.90  | 8.27   | 0.10   | 0.10   |
| 5.5                 | 99.39                       | 99.92  | 99.97  | 99.97  | 099.92 | 99.39  | 89.03  | 12.94  | 12.94  |
| 6.0                 | 99.86                       | 99.99  | 100.00 | 100.00 | 100.00 | 99.99  | 99.86  | 95.66  | 95.66  |
| 6.5                 | 99.97                       | 100.00 | 100.00 | 100.00 | 100.00 | 100.00 | 100.00 | 99.97  | 99.97  |
| 7.0                 | 99.99                       | 100.00 | 100.00 | 100.00 | 100.00 | 100.00 | 100.00 | 100.00 | 100.00 |

**Supplementary table 3.** Estimation of the personalized *a posteriori* risk (PPR) based on an observed Z-score and the percentage of fetal DNA, at a coefficient of variation of 0.5 and an *a priori* risk of 1:100

| Observed<br>Z-score | Percentage of fetal DNA (%) |        |        |        |        |        |        |        |        |
|---------------------|-----------------------------|--------|--------|--------|--------|--------|--------|--------|--------|
|                     | 3                           | 4      | 5      | 6      | 7      | 8      | 9      | 10     |        |
| 0                   | 0.01                        | 0      | 0      | 0      | 0      | 0      | 0      | 0      | 0      |
| 0.5                 | 0.05                        | 0      | 0      | 0      | 0      | 0      | 0      | 0      | 0.     |
| 1.0                 | 0.23                        | 0.02   | 0      | 0      | 0      | 0      | 0      | 0      | 0.     |
| 1.5                 | 1.00                        | 0.14   | 0.01   | 0      | 0      | 0      | 0      | 0      | 0      |
| 2.0                 | 4.33                        | 1.00   | 0.08   | 0      | 0      | 0      | 0      | 0      | 0      |
| 2.5                 | 16.87                       | 6.95   | 1.00   | 0.05   | 0      | 0      | 0      | 0      | 0      |
| 3.0                 | 47.62                       | 35.55  | 10.96  | 1.00   | 0.03   | 0      | 0      | 0      | 0      |
| 3.5                 | 80.30                       | 80.30  | 59.99  | 16.87  | 1.00   | 0.02   | 0      | 0      | 0      |
| 4.0                 | 94.81                       | 96.79  | 94.81  | 80.30  | 25.07  | 1.00   | 0.01   | 0      | 0      |
| 4.5                 | 98.79                       | 99.55  | 99.55  | 98.79  | 91.72  | 35.55  | 1.00   | 0.01   | 0.01   |
| 5.0                 | 99.73                       | 99.94  | 99.96  | 99.94  | 99.73  | 96.79  | 47.62  | 1.00   | 1.00   |
| 5.5                 | 99.94                       | 99.99  | 100.00 | 100.00 | 99.99  | 99.94  | 98.79  | 59.99  | 59.99  |
| 6.0                 | 99.99                       | 100.00 | 100.00 | 100.00 | 100.00 | 100.00 | 99.99  | 99.55  | 99.55  |
| 6.5                 | 100.00                      | 100.00 | 100.00 | 100.00 | 100.00 | 100.00 | 100.00 | 100.00 | 100.00 |
| 7.0                 | 100.00                      | 100.00 | 100.00 | 100.00 | 100.00 | 100.00 | 100.00 | 100.00 | 100.00 |

**Supplementary table 4.** Estimation of the personalized *a posteriori* risk (PPR) based on an observed Z-score and the percentage of fetal DNA, at a coefficient of variation of 0.5 and an *a priori* risk of 1:10

| Observed<br>Z-score | Percentage of fetal DNA (%) |        |        |        |        |        |        |        |
|---------------------|-----------------------------|--------|--------|--------|--------|--------|--------|--------|
|                     | 3                           | 4      | 5      | 6      | 7      | 8      | 9      | 10     |
| 0                   | 0.12                        | 0      | 0      | 0      | 0      | 0      | 0      | 0      |
| 0.5                 | 0.55                        | 0.03   | 0      | 0      | 0      | 0      | 0      | 0      |
| 1.0                 | 0.24                        | 0.20   | 0.01   | 0      | 0      | 0      | 0      | 0      |
| 1.5                 | 10.00                       | 1.48   | 0.08   | 0      | 0      | 0      | 0      | 0      |
| 2.0                 | 33.24                       | 10.00  | 0.90   | 0.03   | 0      | 0      | 0      | 0      |
| 2.5                 | 69.06                       | 45.09  | 10.00  | 0.55   | 0.01   | 0      | 0      | 0      |
| 3.0                 | 90.91                       | 85.85  | 57.51  | 10.00  | 0.33   | 0      | 0      | 0      |
| 3.5                 | 97.82                       | 97.82  | 94.28  | 69.06  | 10.00  | 0.20   | 0      | 0      |
| 4.0                 | 99.51                       | 99.70  | 99.51  | 97.82  | 78.63  | 10.00  | 0.12   | 0      |
| 4.5                 | 99.89                       | 99.96  | 99.96  | 99.89  | 99.19  | 85.85  | 10.00  | 0.08   |
| 5.0                 | 99.98                       | 99.99  | 100.00 | 99.99  | 99.98  | 99.70  | 90.91  | 10.00  |
| 5.5                 | 99.99                       | 100.00 | 100.00 | 100.00 | 100.00 | 99.99  | 99.89  | 94.28  |
| 6.0                 | 100.00                      | 100.00 | 100.00 | 100.00 | 100.00 | 100.00 | 100.00 | 99.96  |
| 6.5                 | 100.00                      | 100.00 | 100.00 | 100.00 | 100.00 | 100.00 | 100.00 | 100.00 |
| 7.0                 | 100.00                      | 100.00 | 100.00 | 100.00 | 100.00 | 100.00 | 100.00 | 100.00 |
